# Supplementary material
Source: PubMed Central journal article supplement (PMC6485670)
Supplement: jciinsight-4-124233-s189.pdf [file jciinsight-4-124233-s189.pdf]

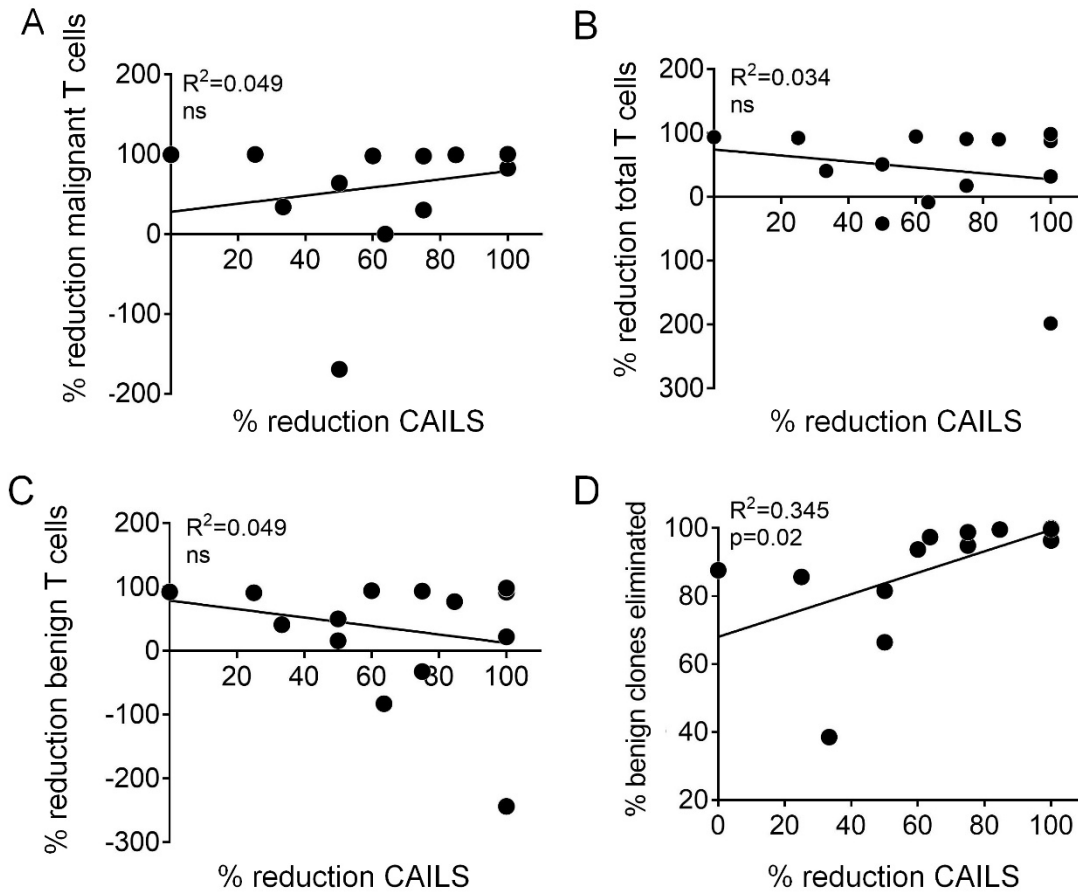

**Fig. S1. Improvement in inflammation is correlated with shift in the benign T cell population but not with depletion of malignant T cells.** Improvement in inflammation (CAILS) did not correlate with reductions in the number of malignant T cells (A), total T cells (B) or benign T cells (C). However, the loss of specific T cell clones from skin and recruitment of a second, distinct T cell population was correlated with reduced inflammation as assessed by CAILS scores (D).

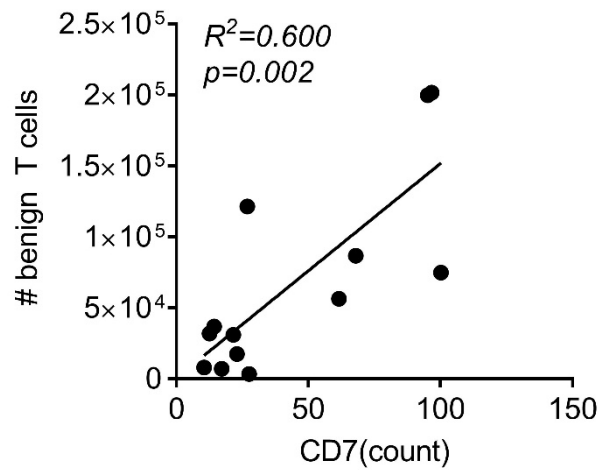

**Fig. S2. CD7 gene counts correlate with the number of benign T cells as measured by HTS.** The number of benign T cells per 100 ng of DNA as measured by HTS, correlates with gene expression of CD7 as measured by NanoString.

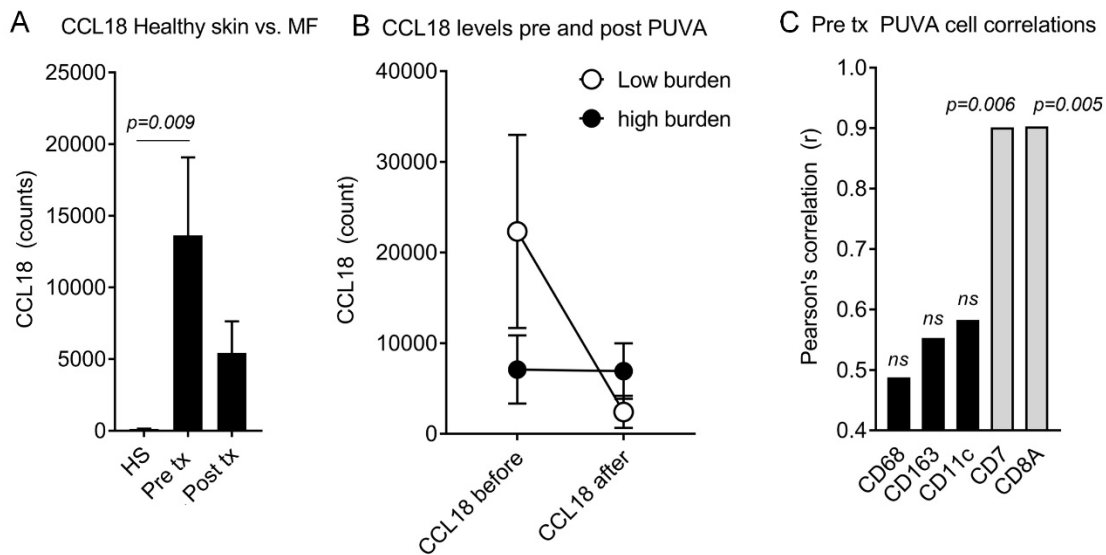

**Fig. S3. CCL18 expression levels and cell associations.** (A) CCL18 gene was expressed in pre-treatment MF (Pre tx) at levels 115-fold higher than in healthy skin (HS) and was reduced after PUVA therapy (Post tx). (B) CCL18 expression levels in low burden (less than 20% malignant T cells) and high burden (>20% malignant T cells) patients before (CCL18 before) and after (CCL18 after) PUVA therapy. (C) Genes associated with CCL18 before PUVA treatment.

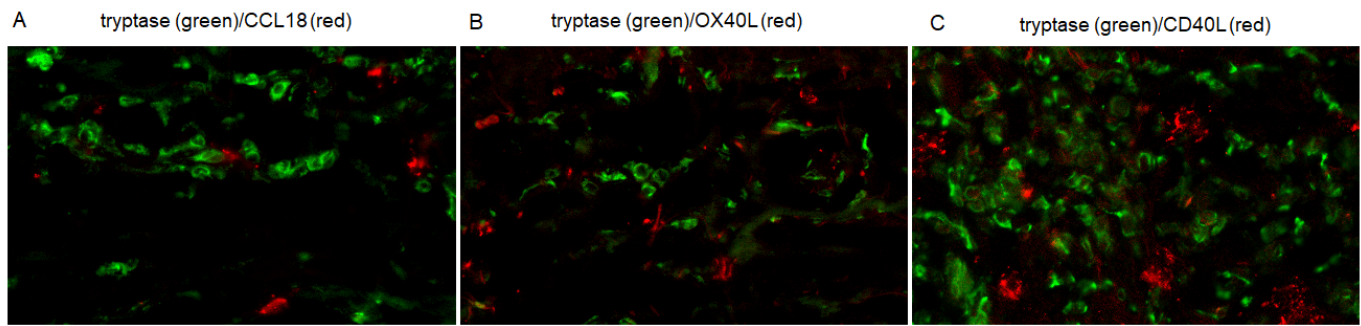

**Fig. S4. Mast cells do not express CCL18, OX40L or CD40L. (A)** Staining for the mast cell specific marker tryptase and CCL18 is shown for a patient with high burden Stage IB CTCL. A lack of co-staining indicates that CCL18 producing cells are not mast cells. **(B)** Tryptase and OX40L staining is shown for a patient with high burden Stage IB CTCL. **(C)** Tryptase and CD40 staining is shown for a patient with high burden Stage IIA MF. In all cases, CCL18, OX40L and CD40L did not co-localize. Similar results were observed in 3 MF patients. Scale bars, 100  $\mu$ m.

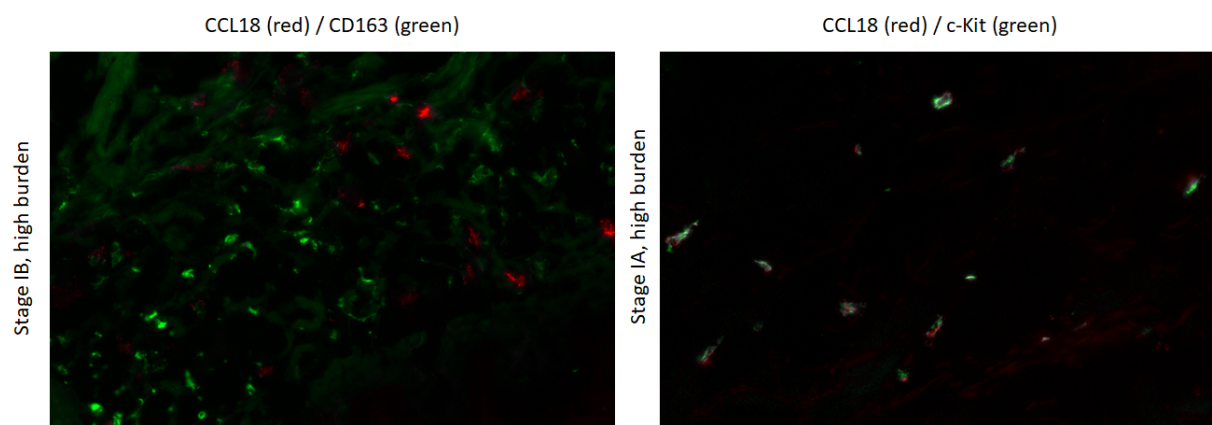

**Fig. S5. Additional donors for observations shown in Fig. 4A (left panel) and Fig. 4B (right panel).** Scale bars, 100  $\mu$ m.

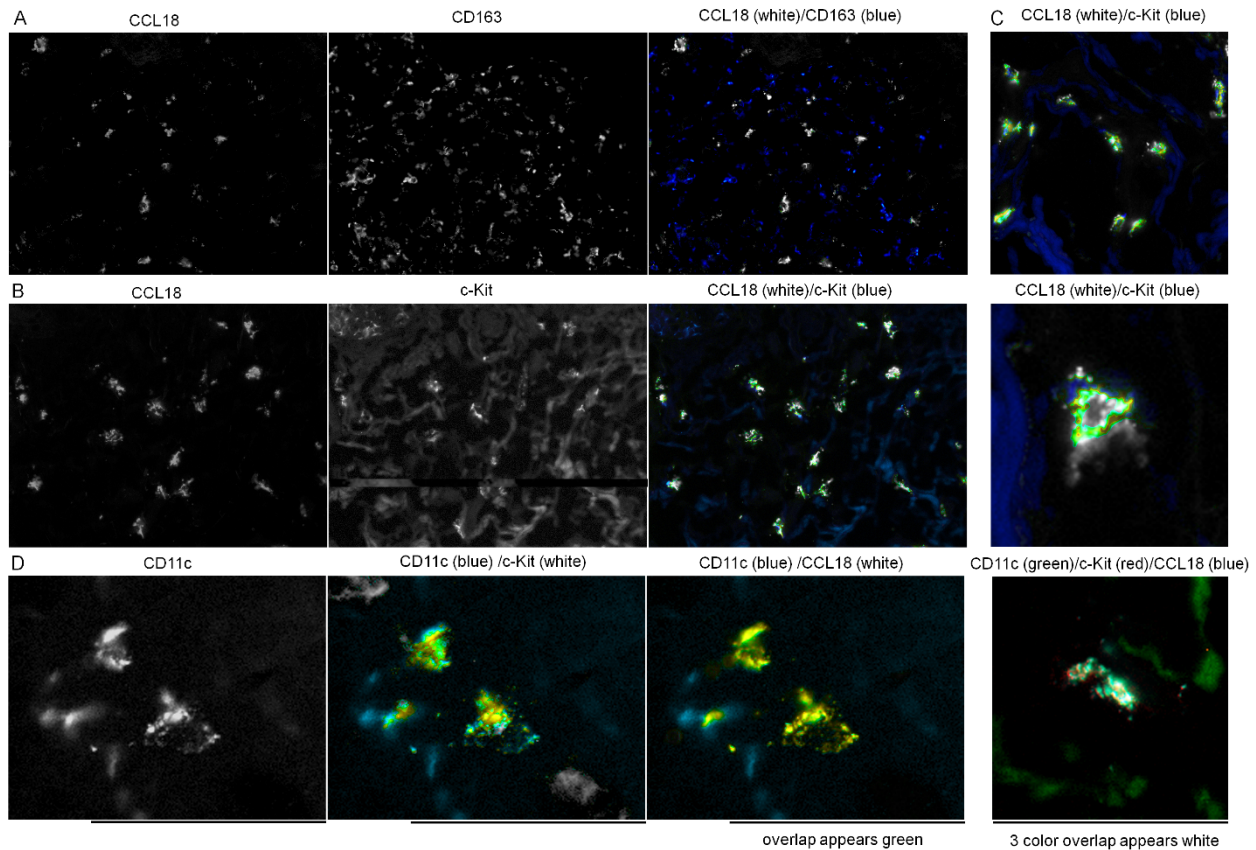

**Fig. S6. Color blind accessible version of Figure 4. CCL18 is produced by c-Kit<sup>+</sup> dendritic cells in mycosis fungoides.** (A) CD163 expressing M2-like macrophages do not produce CCL18 in MF. Co-immunostaining of CCL18 (monochrome white) and CD163 (blue) demonstrated independent staining. Areas of colocalization of the two stains appear green. A patient with low burden Stage IA CTCL is shown; a total of three Stage IA-IB patients showed similar results.; a total of three Stage IA-IB patients showed similar results. (B-C) CCL18 immunostaining colocalized with c-Kit expressing dermal cells. A Stage IB MF patient is shown; a total of four patients showed similar results. (C) Higher power images of immunostaining in the same Stage IA patient studied in (A) are shown. (D) CCL18 producing c-Kit<sup>+</sup> cells are CD11c<sup>+</sup> dendritic cells. A stage IA high burden patient is shown (first three panels) and co-staining for all markers in another Stage IB high burden patient is shown (fourth panel). Triple staining appears white. Stains demonstrating that CCL18<sup>+</sup> cells lacked expression of tryptase are included in Fig. S4. Similar results were observed in high and low burden patients. All lesions are untreated. Scale is same as for Fig. 4.

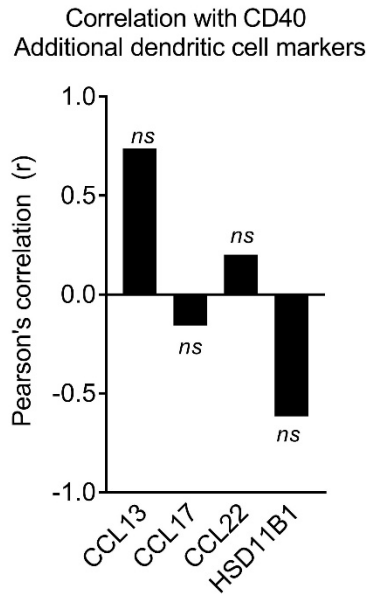

**Fig. S7. Lack of correlation of CD40 with additional dendritic cell markers.** Correlations are shown for CCL13, CCL17, CCL22 and HSD11B1. This data supplements CD40 correlations shown in Figure 5C.

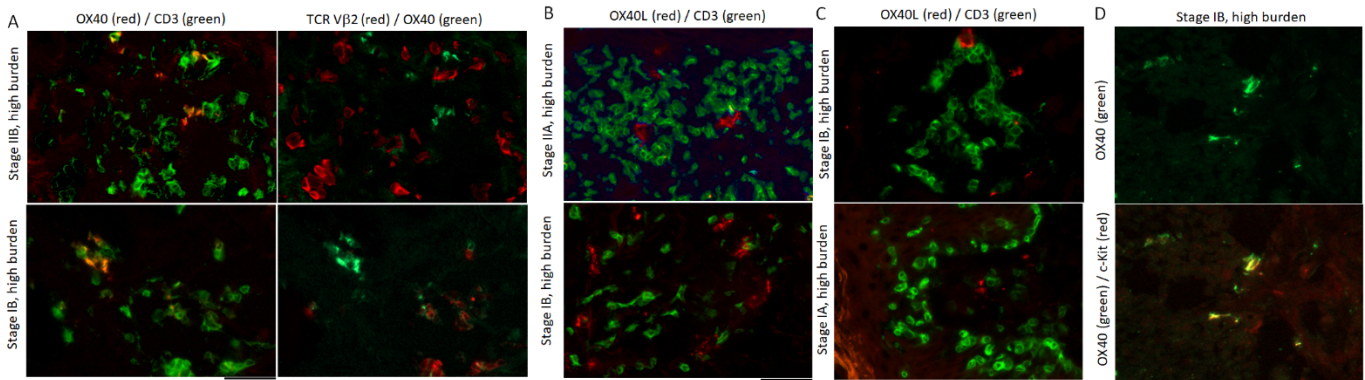

**Fig. S8. Additional donors for observations shown in Fig. 6.** (A) Replicate donors for observations reported in Fig. 6B,C. (B) Replicate donors for observations reported in Fig. 6D. (C) Replicate donors for observations reported in Fig. 6E. Scale bars, 100 μm.

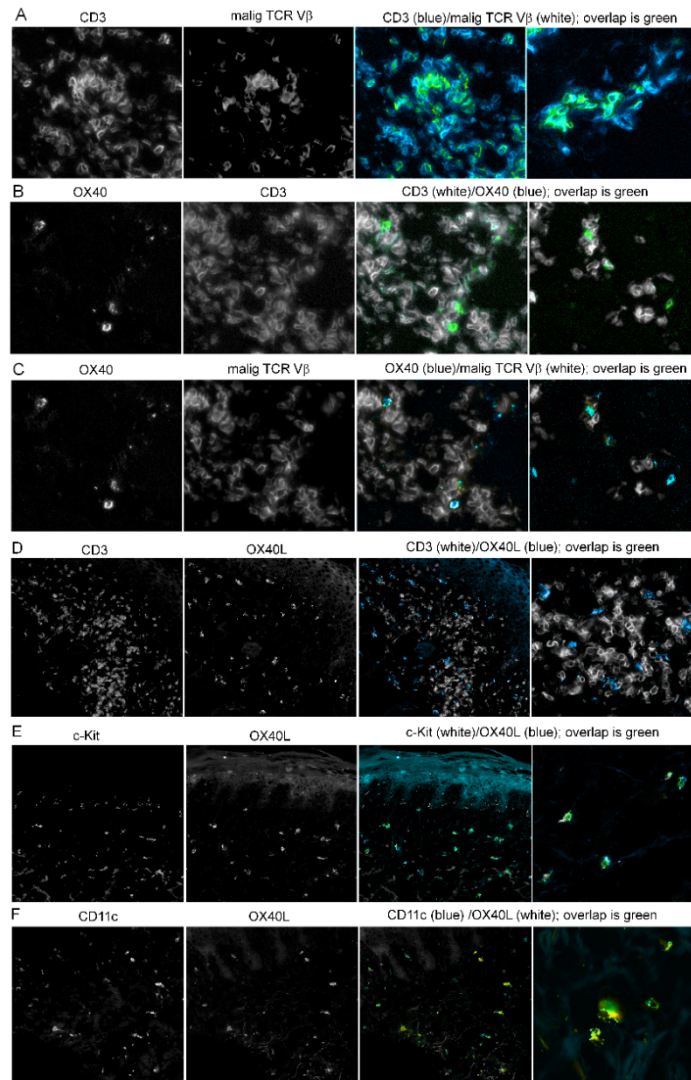

**Fig. S9. Color blind accessible version of Figure 6. OX40 is expressed by benign T cells and OX40L is expressed by c-Kit<sup>+</sup> dendritic cells in mycosis fungoides. (A)** Malignant and benign T cells can be discriminated by co-staining for CD3 and the TCR V $\beta$  expressed by the malignant T cell clone, as identified by HTS. Malignant T cells co-stain for CD3 and the malignant T cell TCR V $\beta$  (areas of co-localization of the two stains appear green) and benign T cells stain only for CD3 (blue). Stains of a patient with high burden Stage IIA are shown; A second field from the same donor is shown in the last panel. **(B)** OX40 is expressed by T cells in MF. A patient with high burden Stage IIA CTCL is shown. A second field from the same donor is shown in the last panel. Similar results were observed in a total of 3 donors. **(C)** OX40 is expressed by benign but not malignant T cells. OX40 and malignant T cell TCR V $\beta$  antibodies stained distinct populations of T cells. A patient with high burden Stage IIA CTCL is shown. A second field from the same donor is shown in the last panel. Similar results were observed in a total of 3 donors. **(D)** OX40L is not expressed by T cells in MF. Antibodies specific for CD3 and OX40L stained distinct T cell populations. A patient with low burden Stage IA CTCL is shown; similar results were observed in a total of 5 donors. **(E)** OX40L is expressed by c-Kit<sup>+</sup> cells in MF. Stains of OX40L and c-Kit colocalized. A patient with high burden Stage IB CTCL is shown; similar results were observed in a total of three donors. **(F)** OX40L expressing cells are CD11c<sup>+</sup> dendritic cells. A patient with high burden Stage IA (first three panels) and a second patient with high burden Stage IB (fourth panel) MF are shown. Stains demonstrating that OX40L<sup>+</sup> cells lacked expression of tryptase are included in Fig. S4. All stains were performed on pre-treatment skin biopsies. Scale is same as for Fig. 6.

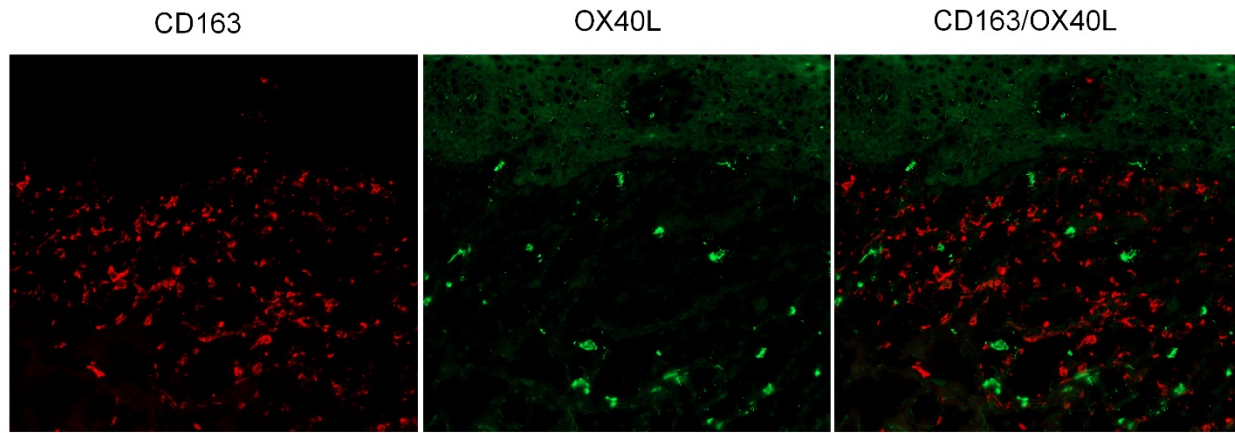

**Fig. S10. OX40L was not expressed by CD163<sup>+</sup> macrophages in MF.** Representative immunostaining of a patient with Stage IA CTCL is shown. Results were confirmed in a second patient with Stage IB MF.

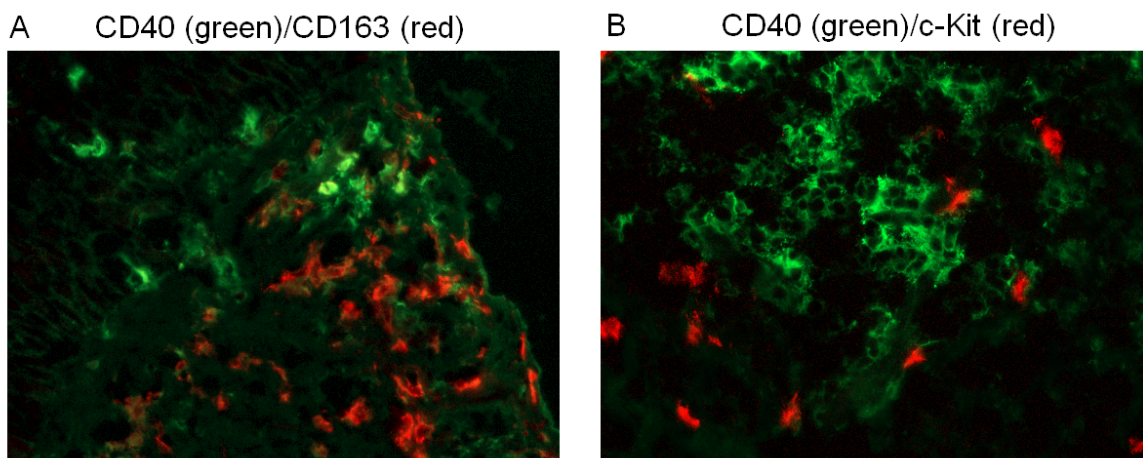

**Fig. S11. CD40 was not expressed by (A) CD163<sup>+</sup> macrophages nor (B) c-Kit<sup>+</sup> cells in MF.** Immunostains of patients with Stage IB (A) and IA (B) CTCL are shown. Similar results were observed in a total of three patients.

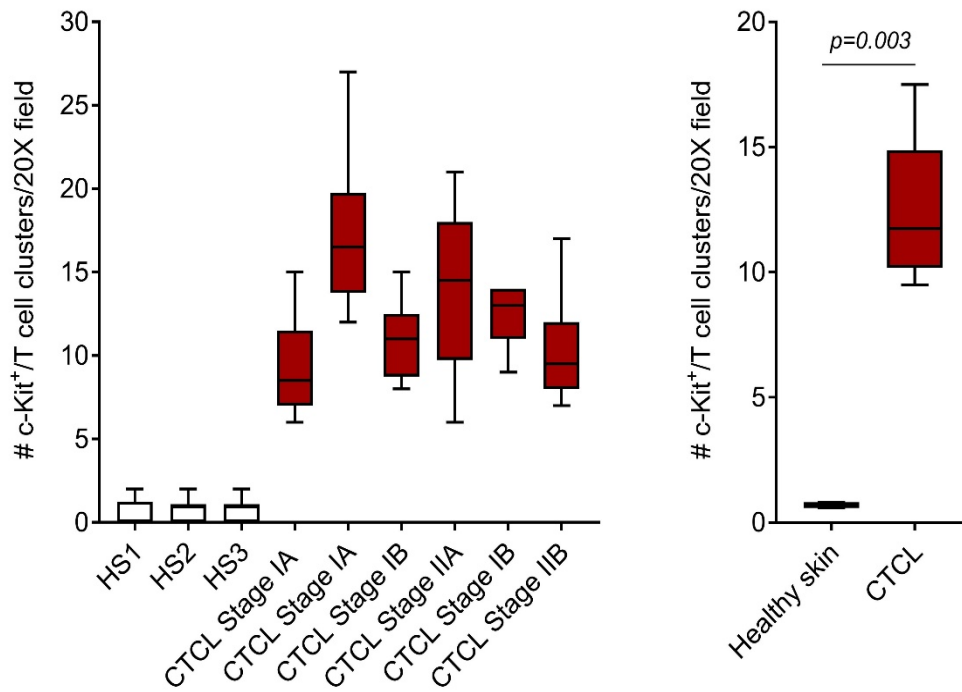

**Fig. S12. C-Kit<sup>+</sup> DC-T cell aggregates are frequent in CTCL but rare in healthy skin.** The number of c-Kit<sup>+</sup> DC/T cell clusters per 20X field, defined as at least one T cell in contact with a c-Kit<sup>+</sup> cell, were quantified in three healthy skin donors (HS1-3) and six pre-treatment lesional CTCL skin biopsies. Statistics for individual patients (left panel) and aggregated healthy vs. disease (right panel) are shown. A minimum of five 20X fields were analyzed for each patient. The mean and range of the data are indicated. Differences between two sample groups were detected using the one tailed Wilcoxon–Mann–Whitney test,  $\alpha=0.05$ .

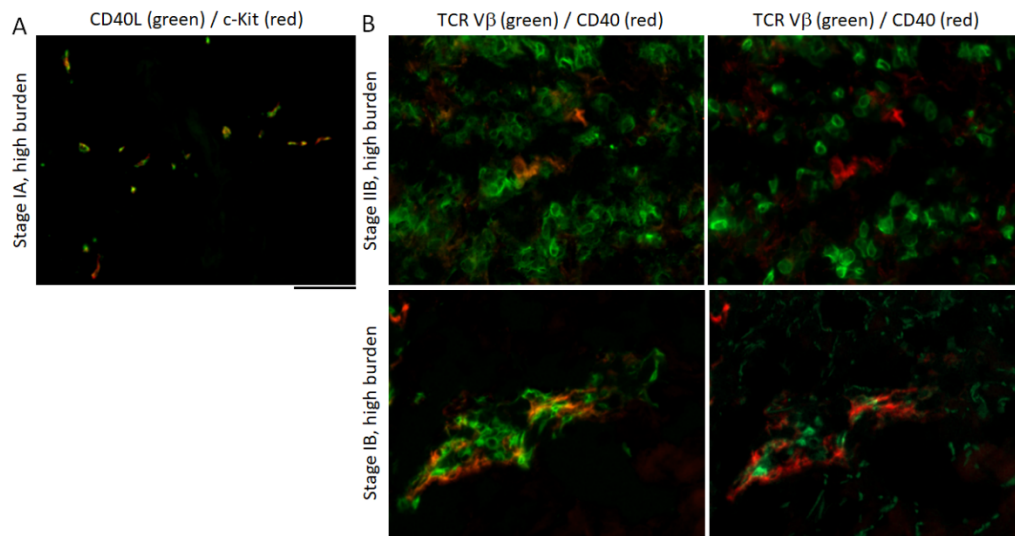

**Fig. S13. Additional donors for observations shown in Fig. 7. (A)** Additional donor for observation reported in Fig. 7B. **(B)** Replicate donors for observations reported in Fig. 7C. Scale bars, 100  $\mu\text{m}$ .



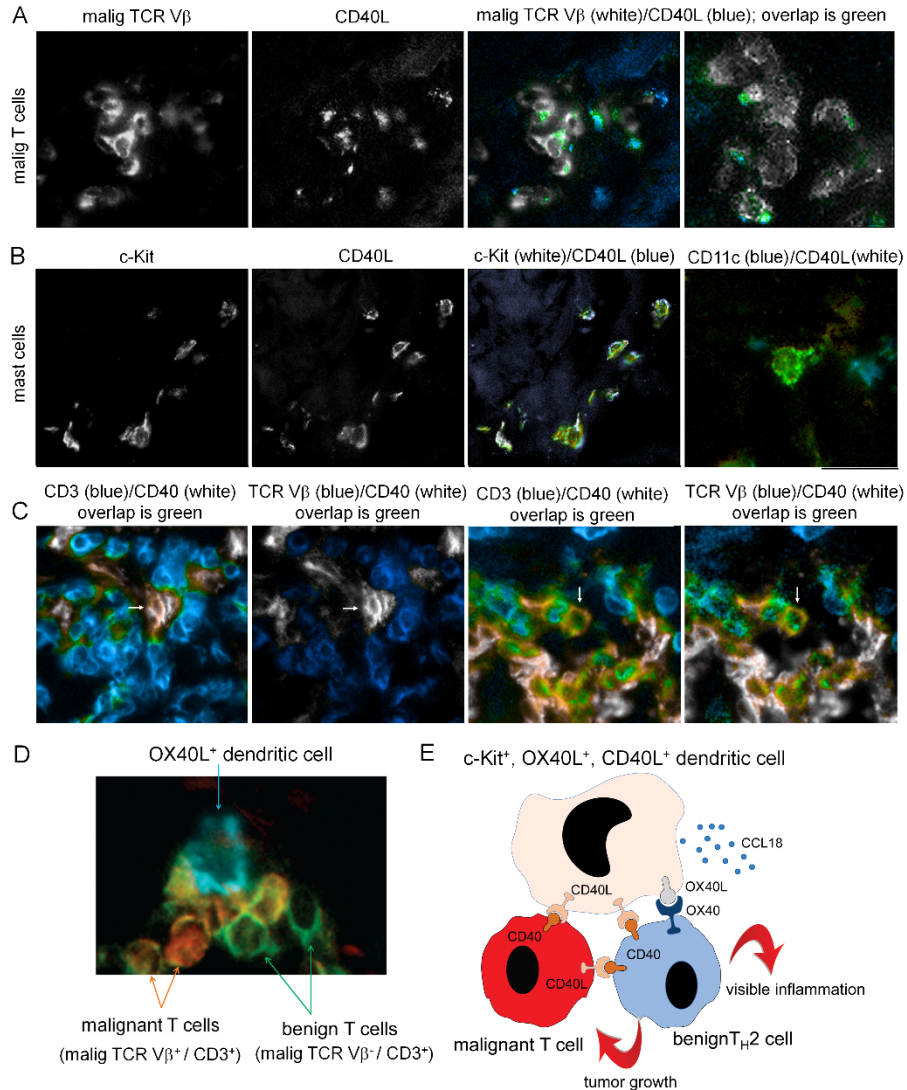

**Fig. S14. Color blind accessible version of Figure 7. CD40/CD40L interactions may participate in an inflammatory synapse created between c-Kit<sup>+</sup> dendritic cells, malignant T cells and benign T cells in mycosis fungoides.** (A) CD40L is expressed by malignant T cells. A patient with high burden Stage IIA (left three panels) and high burden stage IB (right panel) are shown. (B) CD40L is also expressed by c-Kit<sup>+</sup> dendritic cells. A patient with low burden Stage IA (left three panels) and high burden Stage IB (right panel) are shown; similar results were observed in a total of 3 donors. Co-staining of CD40L<sup>+</sup> cells with the DC marker CD11c is shown in the right panel. (C) Both benign and malignant T cells express CD40. The left two panels show benign T cells (CD3<sup>+</sup>V $\beta$ <sup>-</sup>) T cells expressing CD40. The right two panels show malignant T cells (CD3<sup>+</sup>V $\beta$ <sup>+</sup>) expressing CD40. Both fields are from the same high burden Stage IIA donor; similar results were observed in a total of three donors. (D) An inflammatory synapse is created between c-Kit<sup>+</sup> dendritic cells, malignant and benign T cells. Clusters of c-Kit<sup>+</sup> dendritic cells, benign and malignant T cells were frequently observed in MF, as illustrated by this co-stain for OX40L (c-Kit<sup>+</sup> dendritic cell) CD3 and the malignant TCR V $\beta$ . Malignant and benign T cells are indicated by arrows instead of differentially pseudo-coloring this image. A patient with high burden Stage IIB is shown; clusters of these cells types were observed in five donors. (E) A proposed model for c-Kit<sup>+</sup> dendritic cell, benign and malignant T cell interactions in MF. Benign T cells are recruited by c-Kit<sup>+</sup> dendritic cell produced CCL18 and activated by OX40/OX40L and CD40/CD40L interactions leading to visible skin inflammation and pro-tumorogenic signals. C-Kit<sup>+</sup> dendritic cells may also directly stimulate malignant T cells via CD40/CD40L interactions. All stains were performed on pre-treatment skin biopsies. Scale is same as for Fig. 7.

CD3 (red)/OX40L (green)  
DAPI (blue)

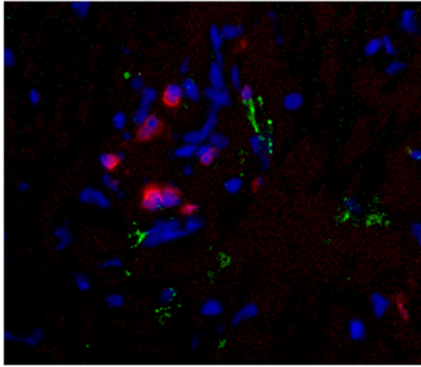

CD3 (red)/CD40 (green)  
DAPI (blue)

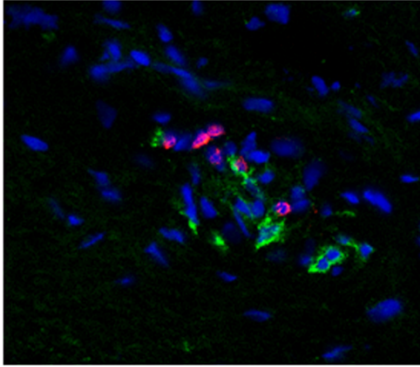

CD3 (red)/CD40L (green)  
DAPI (blue)

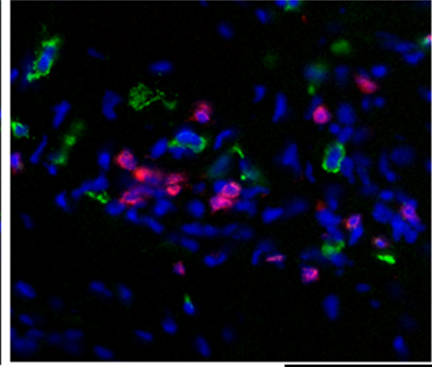

**Fig. S15. T cells in healthy skin do not express CD40, CD40L or OX40L.** Samples of healthy human skin are shown co-stained for CD3 and OX40L (left panel), CD40 (middle panel) and CD40L (right panel). A lack of co-staining demonstrates that these molecules are not expressed by T cells in healthy skin. Similar results were seen in three healthy skin donors.

**Table S1. Genes associated with CD7 before and after PUVA therapy.**

| Pre-PUVA CD7 associated genes |       |                | Post-PUVA CD7 associated genes |       |                |
|-------------------------------|-------|----------------|--------------------------------|-------|----------------|
| Gene                          | r     | P (two-tailed) | Gene                           | r     | P (two-tailed) |
| EWSR1                         | 0.978 | 0.0001         | LTA                            | 0.996 | <0.0001        |
| TNFRSF4                       | 0.971 | 0.0003         | NFKB1                          | 0.996 | <0.0001        |
| NEFL                          | 0.916 | 0.0037         | S100A12                        | 0.995 | <0.0001        |
| CD274                         | 0.915 | 0.0038         | CXCL9                          | 0.994 | <0.0001        |
| CSF1                          | 0.910 | 0.0044         | CXCL11                         | 0.994 | <0.0001        |
| CCL18                         | 0.901 | 0.0056         | CD79B                          | 0.994 | <0.0001        |
| PMCH                          | 0.893 | 0.0067         | LTB                            | 0.992 | <0.0001        |
| CD8A                          | 0.892 | 0.0069         | ISG20                          | 0.990 | 0.0001         |
| GZMM                          | 0.889 | 0.0074         | NFATC1                         | 0.990 | 0.0002         |
| CD80                          | 0.881 | 0.0089         | IL22RA2                        | 0.989 | 0.0002         |
| CXCL16                        | 0.876 | 0.0097         | IFNAR2                         | 0.989 | 0.0002         |
|                               |       |                | IDO1                           | 0.987 | 0.0002         |
|                               |       |                | CD19                           | 0.987 | 0.0003         |
|                               |       |                | TRAF2                          | 0.987 | 0.0003         |
|                               |       |                | TLR10                          | 0.987 | 0.0003         |
|                               |       |                | NFKBIA                         | 0.986 | 0.0003         |
|                               |       |                | MS4A1                          | 0.984 | 0.0004         |
|                               |       |                | CD22                           | 0.983 | 0.0004         |
|                               |       |                | PAX5                           | 0.982 | 0.0005         |
|                               |       |                | SH2D1B                         | 0.981 | 0.0005         |
|                               |       |                | VCAM1                          | 0.981 | 0.0005         |
|                               |       |                | LRRN3                          | 0.980 | 0.0006         |
|                               |       |                | KLRB1                          | 0.980 | 0.0006         |
|                               |       |                | CXCL13                         | 0.979 | 0.0006         |
|                               |       |                | ISG15                          | 0.979 | 0.0007         |

|  |  |  |         |       |        |
|--|--|--|---------|-------|--------|
|  |  |  | EBI3    | 0.979 | 0.0007 |
|  |  |  | NCAM1   | 0.979 | 0.0007 |
|  |  |  | CXCR5   | 0.977 | 0.0008 |
|  |  |  | IL2RA   | 0.977 | 0.0008 |
|  |  |  | BLK     | 0.976 | 0.0009 |
|  |  |  | CD8B    | 0.975 | 0.001  |
|  |  |  | CD40LG  | 0.973 | 0.0011 |
|  |  |  | ADORA2A | 0.972 | 0.0012 |
|  |  |  | CR2     | 0.970 | 0.0013 |
|  |  |  | MX1     | 0.970 | 0.0013 |
|  |  |  | ICOS    | 0.969 | 0.0014 |
|  |  |  | FCER2   | 0.969 | 0.0014 |
|  |  |  | TLR9    | 0.968 | 0.0015 |
|  |  |  | GZMB    | 0.965 | 0.0018 |
|  |  |  | CYLD    | 0.964 | 0.0019 |
|  |  |  | IFIH1   | 0.964 | 0.0019 |
|  |  |  | CCL4    | 0.962 | 0.0022 |
|  |  |  | DUSP4   | 0.961 | 0.0023 |
|  |  |  | NFKB2   | 0.960 | 0.0024 |
|  |  |  | SIGIRR  | 0.959 | 0.0025 |
|  |  |  | CD207   | 0.959 | 0.0025 |
|  |  |  | LAIR2   | 0.957 | 0.0027 |
|  |  |  | ATG12   | 0.956 | 0.0028 |
|  |  |  | IRF7    | 0.956 | 0.0028 |
|  |  |  | LILRB1  | 0.955 | 0.003  |
|  |  |  | IL2RG   | 0.953 | 0.0033 |
|  |  |  | KLRC1   | 0.953 | 0.0033 |
|  |  |  | CCND3   | 0.952 | 0.0035 |

|  |  |  |           |       |        |
|--|--|--|-----------|-------|--------|
|  |  |  | CXCL10    | 0.951 | 0.0035 |
|  |  |  | TNFRSF13C | 0.951 | 0.0035 |
|  |  |  | CHIT1     | 0.951 | 0.0036 |
|  |  |  | POU2F2    | 0.948 | 0.0039 |
|  |  |  | JAK3      | 0.948 | 0.004  |
|  |  |  | DDX58     | 0.946 | 0.0042 |
|  |  |  | BTLA      | 0.946 | 0.0042 |
|  |  |  | CCL5      | 0.945 | 0.0045 |
|  |  |  | CSF2RB    | 0.943 | 0.0048 |
|  |  |  | CD83      | 0.942 | 0.0049 |
|  |  |  | KLRD1     | 0.941 | 0.0051 |
|  |  |  | IL6       | 0.939 | 0.0056 |
|  |  |  | IL19      | 0.938 | 0.0057 |
|  |  |  | CSF3      | 0.935 | 0.0062 |
|  |  |  | GZMM      | 0.935 | 0.0063 |
|  |  |  | TNF       | 0.934 | 0.0063 |
|  |  |  | CCR9      | 0.934 | 0.0065 |
|  |  |  | IL16      | 0.931 | 0.0069 |
|  |  |  | CXCR4     | 0.928 | 0.0076 |
|  |  |  | LILRA4    | 0.927 | 0.0077 |
|  |  |  | PDCD1     | 0.926 | 0.008  |
|  |  |  | RUNX3     | 0.926 | 0.0081 |
|  |  |  | SLAMF1    | 0.926 | 0.0081 |
|  |  |  | CCL3L1    | 0.925 | 0.0082 |
|  |  |  | RELB      | 0.924 | 0.0084 |
|  |  |  | CD37      | 0.924 | 0.0086 |
|  |  |  | CD47      | 0.923 | 0.0087 |
|  |  |  | CCL15     | 0.922 | 0.0088 |

|  |  |  |         |       |        |
|--|--|--|---------|-------|--------|
|  |  |  | ITGA4   | 0.922 | 0.009  |
|  |  |  | TNFSF14 | 0.921 | 0.0091 |
|  |  |  | CD6     | 0.920 | 0.0094 |
|  |  |  | CLU     | 0.917 | 0.01   |

\*Genes with  $r \geq 0.8$  and  $p \leq 0.01$  are listed.

**Table S2. Genes associated with CD8A before and after PUVA therapy.**

| Pre-PUVA CD8 associated genes |       |                | Post-PUVA CD8 associated genes |       |                |
|-------------------------------|-------|----------------|--------------------------------|-------|----------------|
| Gene                          | r     | P (two-tailed) | Gene                           | r     | P (two-tailed) |
| CD274                         | 0.987 | <0.0001        | KLRK1                          | 0.992 | <0.0001        |
| CD80                          | 0.988 | <0.0001        | GZMK                           | 0.991 | 0.0001         |
| SEMG1                         | 0.970 | 0.0003         | CD5                            | 0.985 | 0.0003         |
| CTAGE1                        | 0.966 | 0.0004         | CD3E                           | 0.984 | 0.0004         |
| IGF2R                         | 0.967 | 0.0004         | LCK                            | 0.979 | 0.0007         |
| CXCR1                         | 0.945 | 0.0013         | CD3D                           | 0.977 | 0.0008         |
| PMCH                          | 0.946 | 0.0013         | CD6                            | 0.970 | 0.0013         |
| CXCL16                        | 0.939 | 0.0017         | CXCR4                          | 0.970 | 0.0013         |
| MICA                          | 0.924 | 0.0029         | CD3G                           | 0.970 | 0.0014         |
| NOD1                          | 0.915 | 0.0039         | RUNX3                          | 0.967 | 0.0016         |
| GZMM                          | 0.912 | 0.0042         | TNFSF14                        | 0.966 | 0.0017         |
| CCL18                         | 0.903 | 0.0053         | ICAM3                          | 0.965 | 0.0018         |
| ITGAM                         | 0.903 | 0.0053         | IL2RG                          | 0.964 | 0.0019         |
| IFNA8                         | 0.903 | 0.0054         | NUP107                         | 0.961 | 0.0023         |
| TIRAP                         | 0.903 | 0.0054         | PTPRC                          | 0.957 | 0.0027         |
| SPO11                         | 0.897 | 0.0061         | CYFIP2                         | 0.957 | 0.0028         |
| TNFRSF4                       | 0.895 | 0.0065         | SIGIRR                         | 0.957 | 0.0028         |
| CD7                           | 0.892 | 0.0069         | CCL4                           | 0.951 | 0.0036         |
| TMEFF2                        | 0.891 | 0.0072         | CD2                            | 0.950 | 0.0037         |
| CCL2                          | 0.889 | 0.0075         | CD247                          | 0.949 | 0.0039         |
| TREM2                         | 0.885 | 0.0082         | NFKB2                          | 0.948 | 0.004          |
| EWSR1                         | 0.884 | 0.0083         | TANK                           | 0.947 | 0.0041         |
| PLAU                          | 0.880 | 0.009          | ICAM2                          | 0.947 | 0.0042         |

|      |       |        |          |       |        |
|------|-------|--------|----------|-------|--------|
| IRF5 | 0.878 | 0.0094 | CCND3    | 0.946 | 0.0044 |
|      |       |        | CCR4     | 0.945 | 0.0044 |
|      |       |        | CARD11   | 0.944 | 0.0046 |
|      |       |        | TLK2     | 0.942 | 0.0049 |
|      |       |        | CCL5     | 0.941 | 0.0052 |
|      |       |        | LY9      | 0.938 | 0.0057 |
|      |       |        | SPN      | 0.937 | 0.0058 |
|      |       |        | CD79A    | 0.937 | 0.0059 |
|      |       |        | TNFSF15  | 0.934 | 0.0064 |
|      |       |        | CD200    | 0.931 | 0.007  |
|      |       |        | CCR9     | 0.930 | 0.0071 |
|      |       |        | IL16     | 0.930 | 0.0071 |
|      |       |        | TNFRSF1B | 0.930 | 0.0072 |
|      |       |        | POU2F2   | 0.928 | 0.0076 |
|      |       |        | PRPF38A  | 0.928 | 0.0076 |
|      |       |        | IL21R    | 0.927 | 0.0078 |
|      |       |        | PIK3CD   | 0.924 | 0.0084 |
|      |       |        | BTLA     | 0.923 | 0.0087 |
|      |       |        | CD27     | 0.922 | 0.0088 |
|      |       |        | IL6R     | 0.923 | 0.0088 |
|      |       |        | JAK3     | 0.922 | 0.0089 |
|      |       |        | IFI16    | 0.921 | 0.0092 |
|      |       |        | TNF      | 0.920 | 0.0093 |

\*Genes with  $r \geq 0.8$  and  $p \leq 0.01$  are listed.



**Table S3. Genes associated with the number of malignant T cells/100 ng DNA before and after PUVA therapy.**

| Pre-PUVA Malignant |       |                | Post-PUVA malignant |        |                |
|--------------------|-------|----------------|---------------------|--------|----------------|
| Gene               | r     | P (two-tailed) | Gene                | r      | P (two-tailed) |
| TNFSF4             | 0.959 | 0.0006         | BCL10               | 0.9761 | 0.0009         |
| BTLA               | 0.940 | 0.0016         | KIR3DL1             | 0.9703 | 0.0013         |
| CD40LG             | 0.932 | 0.0022         | ATF1                | 0.9691 | 0.0014         |
| ITK                | 0.933 | 0.0022         | MAPKAPK2            | 0.966  | 0.0017         |
| ETS1               | 0.927 | 0.0027         | TNFRSF13B           | 0.9543 | 0.0031         |
| CXCR4              | 0.907 | 0.0048         | CTSH                | 0.9522 | 0.0034         |
| CCND3              | 0.902 | 0.0055         | CD38                | 0.9509 | 0.0036         |
| NCAM1              | 0.902 | 0.0055         | HLA-C               | 0.9349 | 0.0062         |
| CD3G               | 0.884 | 0.0083         | POU2AF1             | 0.935  | 0.0062         |
| NUP107             | 0.880 | 0.009          | LY86                | 0.9317 | 0.0068         |
| RUNX3              | 0.878 | 0.0093         | SH2B2               | 0.9296 | 0.0073         |
| SIGIRR             | 0.876 | 0.0097         |                     |        |                |

\*Genes with  $r \geq 0.8$  and  $p \leq 0.01$  are listed.

**Table S4: Antibodies used in these studies**

| <b>Antibody</b>      | <b>Fluorophore</b> | <b>Clone</b> | <b>Company</b>  | <b>Catalog #</b> | <b>Concentration</b> |
|----------------------|--------------------|--------------|-----------------|------------------|----------------------|
| CCL18                | AlexaFluor 594     | 64507        | R&D Systems     | IC394T-100UG     | 1:15                 |
| CD163                | AlexaFluor 488     | 215927       | R&D Systems     | FAB1607G-100     | 1:7.5                |
| Ckit                 | AlexaFluor 647     | 104D2        | Biolegend       | 313236           | 1:5                  |
| Ckit                 | FITC               | 104D2        | Biolegend       | 313232           | 1:5                  |
| Vbeta 2              | PE                 | MPB2D5       | Beckman Coulter | IM2213           | 1:10                 |
| Vbeta 5.1            | PE                 | IMMU 157     | Beckman Coulter | IM2285           | 1:10                 |
| CD3                  | AlexaFluor 647     | UCHT1        | Biolegend       | 300416           | 1:40                 |
| OX40                 | AlexaFluor 488     | Ber-ACT35    | Biolegend       | Custom mAb       | 1:400                |
| OX40L                | AlexaFluor 594     | 159403       | R&D Systems     | FAB10541T-100UG  | 1:10                 |
| CD40                 | unconjugated       | 5C3          | Abcam           | ab134379         | 1:500                |
| CD40L                | AlexaFluor 594     | 40804        | R&D Systems     | FAB617T-100UG    | 1:25                 |
| CD11c                | AlexaFluor 488     | ICRF 3.9     | R&D             | FAB1777G-100UG   | 1:50                 |
| Tryptase             | unconjugated       | Polyclonal   | Abcam           | ab196772         | 1:500                |
| Goat anti-rabbit 2°  | AlexaFluor 594     |              | Life Tech       | A11012           | 1:1000               |
| Goat anti-rabbit 2°  | AlexaFluor 647     |              | Life Tech       | A21224           | 1:1000               |
| Rabbit anti-mouse 2° | AlexaFluor 594     |              | Life Tech       | A11062           | 1:1000               |
| Rabbit anti-mouse 2° | AlexaFluor 488     |              | Life Tech       | A11054           | 1:1000               |
